# Supplementary material
Source: Springer Nature journal article supplement (https://www.springermedizin.de/resource/supplementary/12967_2009_446_MOESM3_ESM.pdf/9576552)

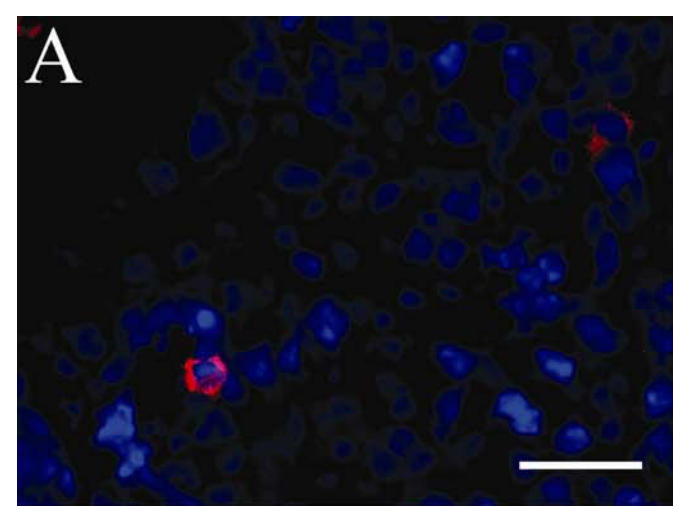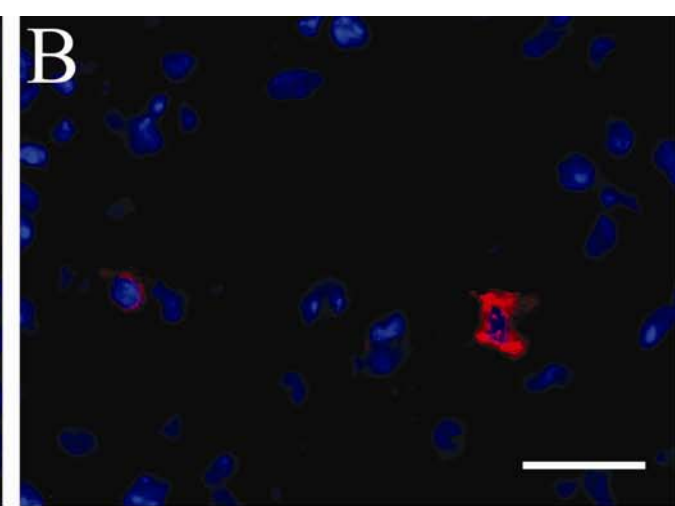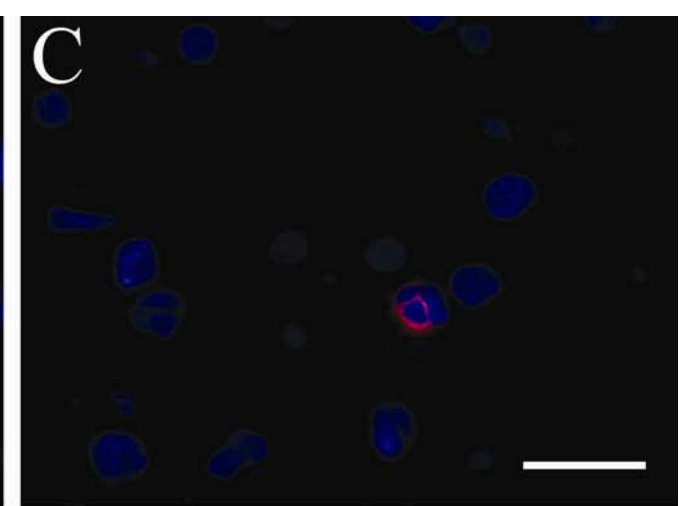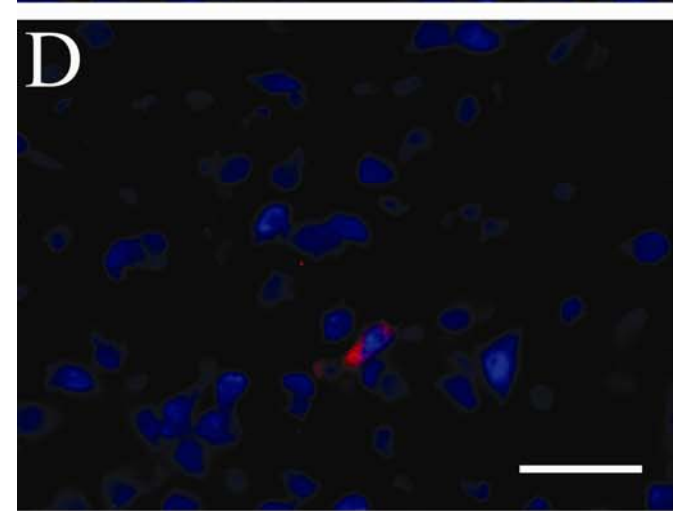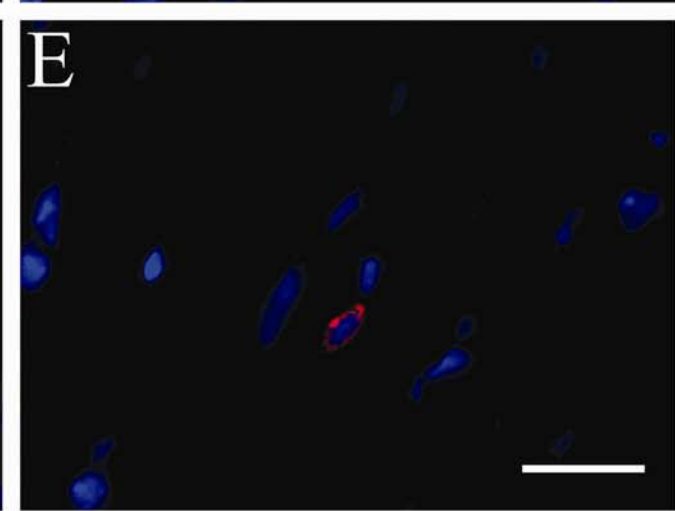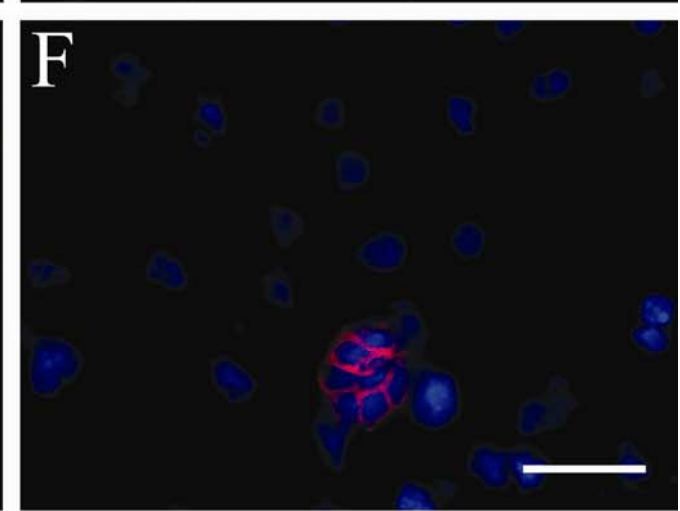

Supplement: MOESM3 [file 9576552]
